# Supplementary material
Source: Springer Nature journal article supplement (https://www.springermedizin.de/resource/supplementary/12914_2011_195_MOESM4_ESM.pdf/9537026)

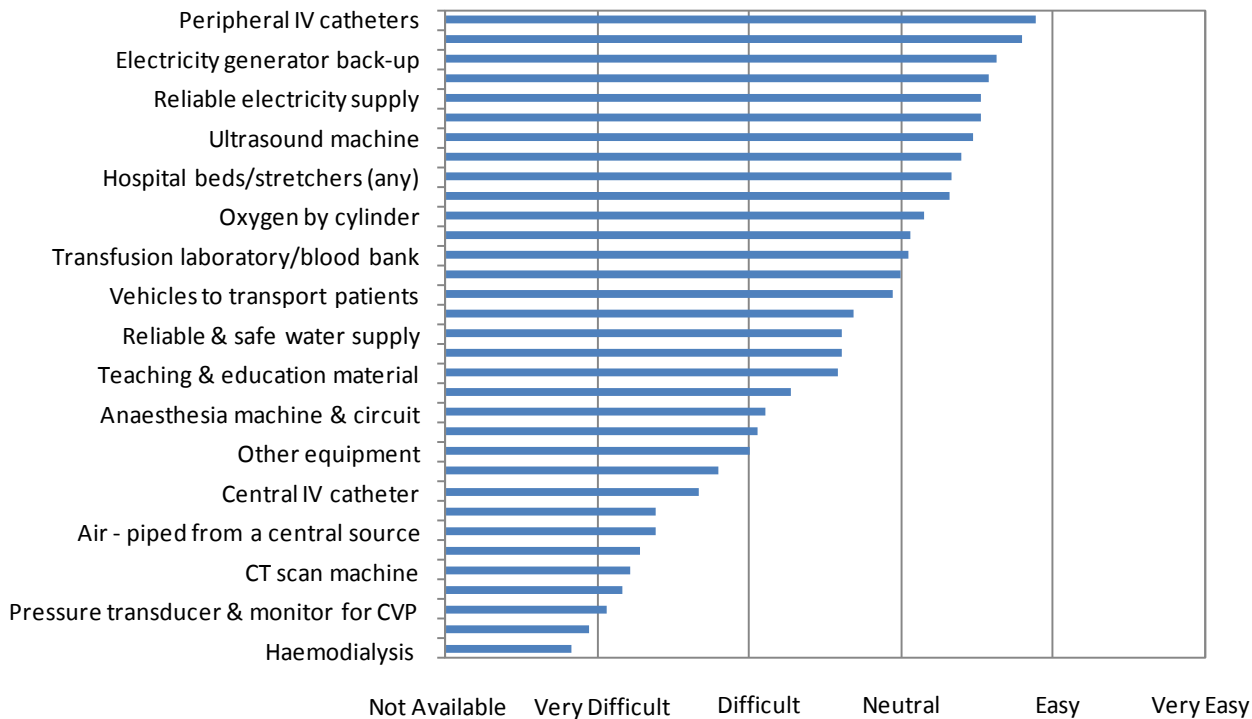

CVP = Central venous pressure. CT = Computed tomography. IV = intravenous.

Supplement: MOESM4 [file 9537026]
